# Supplementary material for: Trends of Bacterial Keratitis Culture Isolates in Jerusalem; a 13- Years Analysis
Source: PLoS One. 2016 Nov 28;11(11):e0165223. doi: 10.1371/journal.pone.0165223 (PMC5125568; doi:10.1371/journal.pone.0165223)
Supplement: S1 Table — (XLSX) [file pone.0165223.s001.xlsx]

## Sheet: Bacterial Keratitis Jer Israel
Reg_Month	REG_YEAR	REG_TIME	TO_CHAR(A.AGE,'99.99')	MATERIAL_NAME	Gram Stain	ORGANISM_CODE	ORGANISM_NAME	AMIKACIN	AMPICILLIN	AMPICILLIN+SULBACTAM	AUGMENTIN	AZTREONAM	CEFAZOLIN	CEFEPIME	CEFTAZIDIME	CEFTRIAXONE	CEFUROXIME	CHLORAMPHENICOL	CIPROFLOXACIN	CLINDAMYCIN	COLISTIN	COTRIMOXAZOLE	ERTAPENEM	ERYTHROMYCIN	FOSFOMYCIN	FUSIDIC ACID	GENTAMICIN	IMIPENEM	LINEZOLID	MEROPENEM	MEZLOCILLIN	MINOCYCLINE	MUPIROCIN	OFLOXACIN	OXACILLIN/METHICILLIN	PENICILLIN	PIPERACILLIN	PIPERACILLIN+TAZOBACTAM	PRISTINAMYCIN	QUINUPRIST+DALFO	RIFAMPICIN	TEICOPLANIN	TETRACYCLINE	TICARCILLIN-CLAVULANIC ACID	TOBRAMYCIN	VANCOMYCIN
Jan	2002	10:09	20.25	קרנית - scrapings ימין	negative	11	Serratia marcescens	S	R		R	S	R	S	S	S	I	S	S		R	S					S	S			S	I		S				S					R
Aug	2002	11:46	83.29	קרנית - scrapings	negative	22	Pseudomonas aeruginosa	S				S		S	S				S		S	R					S	S						S			S	S
Mar	2002	12:38	67.93	קרנית - scrapings ימין	positive	467	Staphylococcus species
Oct	2002	13:02	23.4	קרנית - scrapings ימין	positive	467	Staphylococcus species											S		R		S		R		S	S						R	R	R	R					S	S	S			S
Mar	2002	13:45	33.03	קרנית - scrapings	negative	246	Haemophilus influenzae		R		S					S	S	S				S		S																			S
Sep	2002	14:07	84.42	קרנית - scrapings ימין	positive	467	Staphylococcus species											S		S		R		R		S	R						S	S	S	R					S	S	R			S
Oct	2002	14:27	76.77	קרנית - scrapings ימין	negative	17	Providencia stuartii	S	R		R	S	R	S	S	S	S	S	S		R	S					S	S				R		S			S	S					R
May	2002	14:35	64.14	קרנית - scrapings שמאל	negative	11	Serratia marcescens	S	R		R	S	R	S	S	S	R	S	S		R	S					S	S				S		S			S	S					S
Dec	2002	14:49	63.36	קרנית - scrapings שמאל	negative	115	Moraxella lacunata	S	S		S	S		S	S	S	S	S	S		S	S					S	S				S		S			S	S					S
Nov	2002	15:09	72.64	קרנית - scrapings	negative	7	Klebsiella pneumoniae	S	R		S	S	S	S	S	S	S	S	S		S	S					S	S				S		S			S	S					S
Jul	2002	15:42	12.68	קרנית - scrapings ימין	positive	467	Staphylococcus species											R		S		S		S		R	R							S	S	S					S	S	S			S
Apr	2002	15:57	48.83	קרנית - scrapings שמאל	positive	617	Undefined gram positive rods											R		S		S		R			S							S		S							S			S
Jul	2002	16:56	27.24	קרנית - scrapings ימין	positive	467	Staphylococcus species											R		R		R		R		S	R						R	S	R	R					S	S	R			S
Nov	2002	18:17	28.41	קרנית - scrapings ימין	positive	137	Streptococcus pneumoniae									S		S				R		R												I						S	R			S
Sep	2002	20:04	91.44	קרנית - scrapings ימין	negative	22	Pseudomonas aeruginosa	S				S		S	S				S		S	R					S	S						S			S	S
Aug	2002	21:24	66.2	קרנית - scrapings ימין	positive	467	Staphylococcus species											S		S		S		S		S	S						S	S	S	R					S	S	S			S
Sep	2002	22:28	60.44	קרנית - scrapings ימין	positive	467	Staphylococcus species											S		S		S		S		R	S						R	S	S	R					S	S	S			S
Nov	2002	6:09	32.04	קרנית - scrapings ימין	negative	118	Moraxella catarrhalis		S		S					S	S	S				R		S																			S
Jun	2002	7:37	88.2	קרנית - scrapings שמאל	positive	467	Staphylococcus species											R		S		R		R		R	R						S	S	R	R					S	S	R			S
Nov	2002	7:49	33.9	קרנית - scrapings ימין	positive	467	Staphylococcus species
Dec	2002	8:00	58.68	קרנית - scrapings ימין	positive	467	Staphylococcus species											R		R		R		R		R	R						R	S	R	R					S	S	S			S
Sep	2002	8:11	20.66	קרנית - scrapings ימין	negative	22	Pseudomonas aeruginosa	S				S		S	S				S		S	R					S	S						S			S	S
Dec	2002	9:05	24.06	קרנית - scrapings שמאל	negative	22	Pseudomonas aeruginosa	S						S	S				S		S	R					S	S						S			S	S
Dec	2002	9:20	76.93	קרנית - scrapings ימין	negative	22	Pseudomonas aeruginosa	S				S		S	S				S		S	R					S	S						S			S	S
Sep	2002	9:29	70.69	קרנית - scrapings שמאל	negative	19	Morganella morganii	S	R		R	S	R	S	S	S	R	S	S		R	S					S	S				S		S			S	S					S
Sep	2002	9:36	74.61	קרנית - scrapings שמאל	positive	467	Staphylococcus species											S		S		S		S		S	S						S	S	S	S					S	S	S			S
Jan	2002	9:56	20.57	קרנית - scrapings	positive	467	Staphylococcus species
Apr	2003	0:51	69.05	קרנית - scrapings שמאל	positive	137	Streptococcus pneumoniae									S		S				R		S												S						S	S			S
Nov	2003	11:05	21.14	קרנית - scrapings ימין	negative	22	Pseudomonas aeruginosa	S				S		S	S				S		S	R					S			S				S			S	S
Feb	2003	11:51	35.72	קרנית - scrapings	positive	467	Staphylococcus species											S		S		S		R		S	R						S	S	S	R					S	R	R			S
Jul	2003	11:56	76.26	קרנית - scrapings ימין	positive	467	Staphylococcus species											S		R		S		R		S	S						S	S	S	R					S		S			S
Dec	2003	12:22	35.95	קרנית - scrapings ימין	positive	467	Staphylococcus species
Jul	2003	12:24	74.28	קרנית - scrapings שמאל	positive	467	Staphylococcus species
Nov	2003	12:54	69.65	קרנית - scrapings ימין	positive	137	Streptococcus pneumoniae									S		S				R		S												I						S	S			S
Mar	2003	12:59	69.24	קרנית - scrapings ימין	positive	466	Staphylococcus aureus											S		S		S		S		S	S						S	S	S	R					S	S	R			S
Feb	2003	13:35	41.91	קרנית - scrapings שמאל	positive	466	Staphylococcus aureus											S		S		S		S		S	S						S	S	S	R					S	S	S			S
Oct	2003	13:57	13.97	קרנית - scrapings ימין	negative	22	Pseudomonas aeruginosa	S				S		R	S				S		S	R					S			S				S			R	S
Jan	2003	14:03	64.06	קרנית - scrapings ימין	positive	467	Staphylococcus species
Sep	2003	14:07	76.45	קרנית - scrapings שמאל	positive	137	Streptococcus pneumoniae									S		S				S		S												S						S	S			S
Nov	2003	14:14	64.65	קרנית - scrapings שמאל	negative	22	Pseudomonas aeruginosa	S				S		S	S				S		S	R					R			S				S			S	S
Aug	2003	14:27	50.07	קרנית - scrapings ימין	positive	467	Staphylococcus species
Nov	2003	14:28	16.49	קרנית - scrapings שמאל	positive	467	Staphylococcus species
Aug	2003	14:29	47.16	קרנית - scrapings שמאל	positive	467	Staphylococcus species
Feb	2003	14:39	84.86	קרנית - scrapings שמאל	positive	467	Staphylococcus species
Oct	2003	14:56	74.57	קרנית - scrapings ימין	negative	11	Serratia marcescens	S	R		R	S	R	S	S	S	R	I	S		R	S	S				S			S				S			S	S					R
Jul	2003	14:57	21.72	קרנית - scrapings	positive	467	Staphylococcus species
Sep	2003	15:05	59.15	קרנית - scrapings שמאל	positive	467	Staphylococcus species
Dec	2003	15:25	31.89	קרנית - scrapings שמאל	positive	466	Staphylococcus aureus											S		S		S		S		S	S						S	S	S	R					S	S	S			S
Dec	2003	16:11	20.17	קרנית - scrapings ימין	negative	22	Pseudomonas aeruginosa	S				S		S	S				S		S	R					S			S				S			S	S
Feb	2003	16:44	38.75	קרנית - scrapings ימין	positive	467	Staphylococcus species											S		S		S		S		S	S							S	S	R					S	S	S			S
Sep	2003	17:29	73.68	קרנית - scrapings שמאל	negative	22	Pseudomonas aeruginosa	S				S		S	S				S		S	R					S	S						S			S	S
Oct	2003	18:02	56.58	קרנית - scrapings	positive	467	Staphylococcus species
Jan	2003	18:07	45.78	קרנית - scrapings ימין	negative	7	Klebsiella pneumoniae	S	R		R	S		S	S	S	R	S	S		S	S					S	S				R		S			S	S					R
Jan	2003	18:15	71.02	קרנית - scrapings שמאל	positive	34	Bacillus species
Feb	2003	19:17	2.73	קרנית - scrapings	positive	137	Streptococcus pneumoniae									S		S				S		R												R						S	S			S
Sep	2003	19:24	64.71	קרנית - scrapings	positive	138	Streptococcus species		S									S				S		S										S		S						S	S			S
Sep	2003	19:27	30.46	קרנית - scrapings	positive	466	Staphylococcus aureus											S		S		S		S		S	S						S	S	S	R					S	S	S			S
Jan	2003	19:37	74.15	קרנית - scrapings ימין	positive	467	Staphylococcus species
Apr	2003	19:38	2.88	קרנית - scrapings שמאל	positive	137	Streptococcus pneumoniae									S		S				R		R												S						S	R			S
Jan	2003	19:39	75.8	קרנית - scrapings ימין	positive	466	Staphylococcus aureus											R		S		S		S		S	S						S	S	S	S					S	S	S			S
May	2003	20:19	18.41	קרנית - scrapings ימין	negative	22	Pseudomonas aeruginosa	S				S		S	S				S		S	R					S	R						S			S	S
Nov	2003	20:24	77.9	קרנית - scrapings ימין	negative	7	Klebsiella pneumoniae	S	R		S	S	R	S	S	S	R	R	S		S	S	S				S			S				S			S	S					R
Feb	2003	20:55	84.84	קרנית - scrapings	positive	467	Staphylococcus species
Sep	2003	21:51	18.46	קרנית - scrapings ימין	negative	22	Pseudomonas aeruginosa	S				S		S	S				S		S	R					S			S				S			S	S
Dec	2003	22:24	72.29	קרנית - scrapings ימין	positive	466	Staphylococcus aureus											S		S		S		S		S	S						S	S	S	R					S	S	S			S
Dec	2003	23:25	26.73	קרנית - scrapings	positive	467	Staphylococcus species
May	2003	7:37	75.12	קרנית - scrapings שמאל	positive	617	Undefined gram positive rods		S									S				S		S										S		S							S			S
Oct	2003	7:37	21.23	קרנית - scrapings ימין	positive	137	Streptococcus pneumoniae									S		S				S		S												I						S	S			S
Dec	2003	7:47	72.94	קרנית - scrapings ימין	positive	467	Staphylococcus species
Jul	2003	8:02	41.56	קרנית - scrapings שמאל	negative	22	Pseudomonas aeruginosa	S				S		S	S				S		S	R					S	S						S			S	S
Oct	2003	8:14	79.53	קרנית - scrapings ימין	positive	467	Staphylococcus species
Aug	2003	9:27	45.36	קרנית - scrapings ימין	positive	34	Bacillus species
Aug	2003	9:28	45.36	קרנית - scrapings שמאל	positive	467	Staphylococcus species
Jul	2003	9:38	53.32	קרנית - scrapings שמאל	positive	34	Bacillus species
Sep	2003	9:41	46.76	קרנית - scrapings	negative	22	Pseudomonas aeruginosa	S				I		S	S				S		S	R					S			S				S			S	S
Oct	2003	9:43	40.61	קרנית - scrapings שמאל	positive	467	Staphylococcus species
Oct	2004	0:28	91.32	קרנית - scrapings ימין	positive	137	Streptococcus pneumoniae									S		S				S		R												I						S	S			S
Nov	2004	1:18	49.76	קרנית - scrapings ימין	negative	246	Haemophilus influenzae		S		S					S	S	S				S		S																			S
Oct	2004	10:28	29.48	קרנית - scrapings שמאל	negative	22	Pseudomonas aeruginosa	S				S		S	S				S		S						S			S				S			S	S
Jan	2004	11:41	25.1	קרנית - scrapings ימין	positive	467	Staphylococcus species
Jul	2004	12:02	36.61	קרנית - scrapings	negative	12	Serratia proteamaculans	S	R		R	S	R	S	S	S	R	R	S		R	S	S				S			S				S			S	S					R
Aug	2004	12:06	75.63	קרנית - scrapings ימין	negative	22	Pseudomonas aeruginosa	S				S		S	S				S		S	R					S			S				S			S	S
Aug	2004	12:25	0.92	קרנית - scrapings שמאל	positive	137	Streptococcus pneumoniae									S		S				S		S												S						S	S			S
Nov	2004	12:25	30.26	קרנית - scrapings שמאל	positive	467	Staphylococcus species											S		S		S		S		S	S						S	S	S	S					S	S	S			S
Aug	2004	12:44	31.58	קרנית - scrapings ימין	positive	467	Staphylococcus species
Sep	2004	13:01	70.35	קרנית - scrapings שמאל	positive	138	Streptococcus species		S									S				S		S										S		S						S	S			S
Feb	2004	13:19	85.38	קרנית - scrapings שמאל	positive	467	Staphylococcus species
Feb	2004	13:47	8.23	קרנית - scrapings ימין	positive	467	Staphylococcus species
Jul	2004	14:02	78.31	קרנית - scrapings שמאל	negative	22	Pseudomonas aeruginosa	I				S		S	S				S		S	R					R			S				S			R	S
Aug	2004	14:10	75.38	קרנית - scrapings ימין	positive	467	Staphylococcus species											R		S		R		R		S	R						R	R	R	R					S	S	R			S
Jan	2004	14:25	42.58	קרנית - scrapings ימין	positive	467	Staphylococcus species
Jul	2004	14:31	14.94	קרנית - scrapings ימין	negative	22	Pseudomonas aeruginosa	S				S		S	S				S		S	R					S			S				S			S	S
Aug	2004	14:53	49.42	קרנית - scrapings שמאל	positive	467	Staphylococcus species
Dec	2004	16:47	20.36	קרנית - scrapings שמאל	positive	467	Staphylococcus species											S		S		S		S		S	S						S	S	S	S					S	S	R			S
Aug	2004	16:52	75.39	קרנית - scrapings ימין	positive	467	Staphylococcus species											R		S		R		R		S	R						R	R	R	R					S	S	R			S
Feb	2004	16:58	75.99	קרנית - scrapings שמאל	positive	466	Staphylococcus aureus											S		R		S		R		S	S						S	R	R	R					S	S	S			S
Jan	2004	17:16	18.92	קרנית - scrapings ימין	negative	246	Haemophilus influenzae		S		S					S	S	S				S		I																			S
Apr	2004	17:18	84.06	קרנית - scrapings שמאל	positive	137	Streptococcus pneumoniae		S									S				R		S										S		S						S	S			S
Jul	2004	18:27	26.29	קרנית - scrapings שמאל	positive	467	Staphylococcus species
Jun	2004	18:36	13.07	קרנית - scrapings שמאל	positive	137	Streptococcus pneumoniae									S		S				S		S												I						S	S			S
Oct	2004	18:40	65.82	קרנית - scrapings שמאל	positive	373	Brevibacterium species											S		R		S		S		S	S							S		S					S		S			S
Dec	2004	19:33	59.73	קרנית - scrapings שמאל	negative	7	Klebsiella pneumoniae	S	R		S	S	S	S	S	S	S	S	S		S	R					S			S				S			S	S					R
Jan	2004	20:53	25.21	קרנית - scrapings ימין	positive	467	Staphylococcus species
Dec	2004	21:17	17.26	קרנית - scrapings שמאל	positive	467	Staphylococcus species											S		S		S		S		S	S						S	S	S	S					S	S	S			S
Aug	2004	21:40	16.68	קרנית - scrapings שמאל	negative	22	Pseudomonas aeruginosa	S				S		S	S				S		S	R					S			S				S			S	S
Feb	2004	22:21	46.14	קרנית - scrapings ימין	positive	467	Staphylococcus species
Aug	2004	22:53	17.64	קרנית - scrapings ימין	negative	7	Klebsiella pneumoniae	S	R		S	S	S	S	S	S	S	S	S		S	S	S				S			S				S			S	S					S
Aug	2004	23:02	74.39	קרנית - scrapings שמאל	negative	11	Serratia marcescens	S	R		R	S	R	S	S	S	R	S	S		R	S	S				S			S				S			S	S					R
Mar	2004	7:20	45.28	קרנית - scrapings ימין	positive	466	Staphylococcus aureus											S		S		S		S		S	S						S	S	S	R					S	S	S			S
Feb	2004	7:48	72.88	קרנית - scrapings שמאל	positive	467	Staphylococcus species
Aug	2004	7:48	49.14	קרנית - scrapings שמאל	negative	22	Pseudomonas aeruginosa	S				S		S	S				S		S	R					S			S				S			S	S
Jul	2004	8:39	16.63	קרנית - scrapings שמאל	positive	467	Staphylococcus species
May	2004	9:11	20.26	קרנית - scrapings ימין	positive	467	Staphylococcus species
Nov	2004	9:12	42.39	קרנית - scrapings שמאל	positive	467	Staphylococcus species											S		S		S		S		S	S						S	S	S	R					S	S	S			S
May	2004	9:36	25.97	קרנית - scrapings ימין	negative	81	Pseudomonas species	S				S		S	S				S		S	R					S			S				S			S	S
Feb	2004	9:55	42.37	קרנית - scrapings שמאל	positive	467	Staphylococcus species
Mar	2005	1:02	20.96	קרנית - scrapings ימין	positive	467	Staphylococcus species
May	2005	10:55	21.77	קרנית - scrapings	positive	34	Bacillus species
Aug	2005	11:07	51.69	קרנית - scrapings ימין	negative	19	Morganella morganii	S	R		S	S	R	S	S	S	S	S	S		R	S	S				S	S						S			S	S					R
Mar	2005	11:29	22.12	קרנית - scrapings ימין	negative	11	Serratia marcescens	S	R		R	S	R	S	S	S	R	S	S		R	S	S				S			S				S			S	S					R
Jan	2005	11:50	49.54	קרנית - scrapings שמאל	negative	22	Pseudomonas aeruginosa	S				S		S	S				S		S	R					S			S				S			S	S
Apr	2005	12:24	86.56	קרנית - scrapings שמאל	positive	467	Staphylococcus species											R		S		S		R		S	S						S	S	S	R					S	S	S			S
Jul	2005	13:12	81.26	קרנית - scrapings שמאל	negative	14	Citrobacter koseri	S	R		S	S	S	S	S	S	S	S	S		S	S	S				S			S				S			S	S					S
Jan	2005	13:23	80.45	קרנית - scrapings ימין	positive	466	Staphylococcus aureus											R		R		S		R		S	R						S	R	R	R					S	S	S			S
Oct	2005	13:55	18.92	קרנית - scrapings שמאל	positive	138	Streptococcus species		S									S				S		S										S		S						S	S			S
Sep	2005	15:07	37.16	קרנית - scrapings שמאל	positive	467	Staphylococcus species
Dec	2005	15:43	24.77	קרנית - scrapings שמאל	positive	138	Streptococcus species		S									S				S		S										S		S						S	S			S
Nov	2005	15:47	52.48	קרנית - scrapings ימין	positive	467	Staphylococcus species											S		S		S		S		S	S						S	S	S	R					S	S	S			S
Jul	2005	16:06	16.59	קרנית - scrapings שמאל	positive	467	Staphylococcus species											S		S		S		S		S	S						S	S	S	R					S	S	S			S
Apr	2005	16:32	21.85	קרנית - scrapings ימין	positive	467	Staphylococcus species											S		S		S		S		S	S						S	S	S	S					S	S	S			S
Mar	2005	17:01	80.57	קרנית - scrapings שמאל	positive	467	Staphylococcus species
Oct	2005	17:32	52.76	קרנית - scrapings ימין	positive	467	Staphylococcus species											R		S		S		S		S	S						S	S	S	R					S	S	R			S
Jan	2005	17:40	59.02	קרנית - scrapings ימין	positive	467	Staphylococcus species											S		S		S		R		S	S						S	S	S	S					S	S	S			S
Dec	2005	18:01	43.44	קרנית - scrapings שמאל	negative	22	Pseudomonas aeruginosa	S				S		S	S				S		S						S	S						S			S	S
Jul	2005	18:30	18.82	קרנית - scrapings ימין	negative	22	Pseudomonas aeruginosa	S				S		S	S				S		S						S			S				S			S	S
May	2005	19:03	89.98	קרנית - scrapings ימין	positive	137	Streptococcus pneumoniae									S		S				S		S												S						S	S			S
Aug	2005	19:40	36.23	קרנית - scrapings ימין	negative	40	Acinetobacter lwoffii	S	S		S	S	R	S	S	S	S	S	S		S	S	S				S	S				S		S			R	S					S
Sep	2005	21:22	91.42	קרנית - scrapings שמאל	negative	22	Pseudomonas aeruginosa	S				S		S	S				S		S						S	S						S			S	S
Feb	2005	22:03	86.41	קרנית - scrapings שמאל	positive	467	Staphylococcus species											R		S		S		S		S	R						S	S	R	R					S	S	R			S
Aug	2005	22:11	12.95	קרנית - scrapings שמאל	positive	467	Staphylococcus species											S		S		S		S		S	S						S	S	S	S					S	S	R			S
Feb	2005	22:39	22.99	קרנית - scrapings ימין	negative	11	Serratia marcescens	S	R		R	S	R	S	S	S	R	S	S		R	S	S				S			S				S			S	S					R
Dec	2005	23:09	95.71	קרנית - scrapings שמאל	negative	32	Moraxella species	S	S				S	S	S	S	S	S	S		S	S					S	S						S			S	S					S
Oct	2005	3:42	18.93	קרנית - scrapings שמאל	negative	22	Pseudomonas aeruginosa	S				S		S	S				S		S	R					S	S						S			S	S
Jan	2005	8:18	33.68	קרנית - scrapings שמאל	negative	22	Pseudomonas aeruginosa	S				S		S	S				S		S	R					S			S				S			S	S
Apr	2005	9:50	18.43	קרנית - scrapings	positive	467	Staphylococcus species											S		S		S		S		R	S						S	S	R	R					S	S	R			S
Oct	2006	0:06	31.15	קרנית - scrapings שמאל	negative	22	Pseudomonas aeruginosa	S							S				S		S						S	S						S			S	S
Jun	2006	0:29	49.21	קרנית - scrapings ימין	positive	467	Staphylococcus species											R		S		S		S		S	R						S	S	R	R					S	S	R			S
Sep	2006	10:24	25.54	קרנית - scrapings	positive	466	Staphylococcus aureus											S		S		S		S		R	S						S	S	S	R					S	S	S			S
Jul	2006	10:37	36.76	קרנית - scrapings	positive	466	Staphylococcus aureus											S		R		S		R		S	R						S	R	R	R					S	S	S			S
Feb	2006	10:41	70.35	קרנית - scrapings	positive	467	Staphylococcus species
Dec	2006	11:21	74.93	קרנית - scrapings שמאל	positive	34	Bacillus species
May	2006	11:33	77.95	קרנית - scrapings ימין	negative	22	Pseudomonas aeruginosa	S				S			S				S		S						S	S						R			S	S
Nov	2006	11:33	72.6	קרנית - scrapings	positive	137	Streptococcus pneumoniae									S		S		S		S		S												S						S	S			S
Jul	2006	11:50	36.82	קרנית - scrapings	negative	8	Klebsiella oxytoca	S	R		S		S		S	S	S	S	S		S	S	S				S	S						S			S	S					S
Sep	2006	12:37	15.49	קרנית - scrapings שמאל	negative	22	Pseudomonas aeruginosa	S							S				S		S	R					S	S						S			S	S
Jun	2006	12:42	73.49	קרנית - scrapings ימין	positive	466	Staphylococcus aureus											S		S		S		S		S	S						S	S	S	R					S	S	S			S
Jun	2006	13:37	42.43	קרנית - scrapings שמאל	positive	137	Streptococcus pneumoniae									S		S		S		R		S												R						S	S			S
Sep	2006	13:37	28.5	קרנית - scrapings	negative	22	Pseudomonas aeruginosa	S							S				S		S	R					S	S						S			S	S
Jan	2006	13:38	90.81	קרנית - scrapings ימין	positive	137	Streptococcus pneumoniae									S		S				S		S												S						S	S			S
Aug	2006	13:49	26.54	קרנית - scrapings ימין	positive	34	Bacillus species
Dec	2006	13:55	18.83	קרנית - scrapings שמאל	positive	467	Staphylococcus species											S		S		S		S		S	S						S	S	S	S					S	S	S			S
Dec	2006	13:58	18.72	קרנית - scrapings שמאל	negative	6	Escherichia coli	S	R		R		R		S	S	R	S	S		S	S	S				S	S						S			S	S					S
Mar	2006	14:14	64.26	קרנית - scrapings ימין	negative	22	Pseudomonas aeruginosa	R				S			S				R		S						R	S						R			S	S
Jul	2006	14:28	41.35	קרנית - scrapings ימין	negative	12	Serratia proteamaculans	S	R		R		R		S	S	R	S	S		R	S	S				S	S						S			S	S					S
Feb	2006	15:02	77.68	קרנית - scrapings ימין	positive	467	Staphylococcus species
Jan	2006	15:47	53.47	קרנית - scrapings	positive	466	Staphylococcus aureus											S		S		S		S		S	S						S	S	S	R					S	S	S			S
Jun	2006	16:07	84.97	קרנית - scrapings	negative	22	Pseudomonas aeruginosa	S							S				S		S	R					R	S						S			S	S
Apr	2006	17:20	84.81	קרנית - scrapings	negative	22	Pseudomonas aeruginosa	S				S			S				S		S						S	S						S			S	S
Jul	2006	17:37	71.83	קרנית - scrapings שמאל	negative	22	Pseudomonas aeruginosa	S							S				S		S	R					S	S						S			S	S
Apr	2006	17:53	24.15	קרנית - scrapings ימין	positive	467	Staphylococcus species											S		S		S		R		S	S						S	S	R	R					S	S	S			S
Oct	2006	18:05	68.95	קרנית - scrapings שמאל	positive	466	Staphylococcus aureus											S		S		S		S		S	S						S	S	S	S					S	S	S			S
Jan	2006	18:06	46.15	קרנית - scrapings שמאל	negative	11	Serratia marcescens	S	R		R	S	R	S	S	S	R	S	S		R	S					S	S						S			S	S					R
Mar	2006	19:18	20.47	קרנית - scrapings ימין	positive	137	Streptococcus pneumoniae									S		S				S		S												S						S	S			S
Jun	2006	22:07	74.46	קרנית - scrapings שמאל	negative	22	Pseudomonas aeruginosa	S							S				S		S						S	S						S			S	S
Apr	2006	8:26	15.73	קרנית - scrapings שמאל	positive	467	Staphylococcus species											S		S		S		S		S	S						S	S	S	R					R	S	S			S
Jul	2006	8:43	22.68	קרנית - scrapings ימין	negative	22	Pseudomonas aeruginosa	S							S				S		S						S	S						S			S	S
Aug	2006	8:47	18.55	קרנית - scrapings	negative	22	Pseudomonas aeruginosa	S							S				S		S						S	S						S			S	S
May	2006	9:03	8.14	קרנית - scrapings ימין	positive	466	Staphylococcus aureus											S		S		S		S		S	S						S	S	S	R					S	S	S			S
Aug	2006	9:03	50.34	קרנית - scrapings שמאל	negative	22	Pseudomonas aeruginosa	S							S				S		S						S	S						S			S	S
Feb	2006	9:09	52.98	קרנית - scrapings שמאל	positive	467	Staphylococcus species
Feb	2006	9:13	63.93	קרנית - scrapings שמאל	positive	137	Streptococcus pneumoniae									S		S				S		S												S						S	S			S
Oct	2006	9:25	24.1	קרנית - scrapings שמאל	negative	22	Pseudomonas aeruginosa	S							S				S		S						S	S						S			S	S
Sep	2007	0:19	33.08	קרנית - scrapings ימין	positive	467	Staphylococcus species
Jun	2007	10:31	24.01	קרנית - scrapings ימין	negative	22	Pseudomonas aeruginosa	S							S				S		S	R					S	S						S			S	S
Oct	2007	12:10	52.56	קרנית - scrapings שמאל	positive	467	Staphylococcus species
Dec	2007	12:19	69.56	קרנית - scrapings ימין	negative	9	Enterobacter cloacae	S	R		R		R		S	S	R	S	S		S	S	S				S	S						S			S	S
Feb	2007	12:21	93.7	קרנית - scrapings שמאל	negative	22	Pseudomonas aeruginosa	S							S				S		S	R					S	S						S			S	S
May	2007	13:43	19.73	קרנית - scrapings	positive	138	Streptococcus species		S									S		S		S		S										S		S						S				S
Jul	2007	15:10	63.62	קרנית - scrapings שמאל	negative	19	Morganella morganii	S	R		R		R		S	S	R	S	S		R	S	S				S	S						S			S	S
Dec	2007	15:14	36.15	קרנית - scrapings שמאל	positive	137	Streptococcus pneumoniae									S		S		S		S		S										S		S							S			S
May	2007	16:15	59.52	קרנית - scrapings	positive	466	Staphylococcus aureus											R		S		S		S		S	S							S	S	R					S	S				S
Sep	2007	16:22	56.82	קרנית - scrapings שמאל	positive	466	Staphylococcus aureus											S	S	S		S		S		S	S								S	S					S					S
Jul	2007	16:40	42.46	קרנית - scrapings שמאל	positive	137	Streptococcus pneumoniae									S		S		S		S		S										S		R							S			S
Jan	2007	17:00	13.33	קרנית - scrapings ימין	negative	22	Pseudomonas aeruginosa	S							S				S		S	R					S	S						S			S	S
Dec	2007	17:46	55.08	קרנית - scrapings ימין	positive	467	Staphylococcus species											S	S	S		S		S		R	S								S	R					S					S
Dec	2007	18:24	50.52	קרנית - scrapings ימין	positive	467	Staphylococcus species
Dec	2007	19:32	59.69	קרנית - scrapings שמאל	negative	14	Citrobacter koseri	S	R		S		S		S	S	S	S	S		S	S	S				S	S						S			S	S
Aug	2007	19:35	21.58	קרנית - scrapings שמאל	negative	22	Pseudomonas aeruginosa	S							S				S		S	R					S	S						S			S	S
Jul	2007	20:52	23.43	קרנית - scrapings שמאל	positive	467	Staphylococcus species
Oct	2007	21:13	14.7	קרנית - scrapings שמאל	positive	137	Streptococcus pneumoniae									S		S		S		I		R										S		R							R			S
Nov	2007	21:43	2	קרנית - scrapings שמאל	positive	138	Streptococcus species
Dec	2007	21:52	22.41	קרנית - scrapings ימין	negative	22	Pseudomonas aeruginosa	S							S				S		S	R					S	S						S			S	S
Jul	2007	22:01	60.74	קרנית - scrapings שמאל	positive	467	Staphylococcus species											S		S		S		S		S	S								S	R					S					S
Dec	2007	22:21	19.49	קרנית - scrapings ימין	positive	467	Staphylococcus species											R	S	S		S		S		S	S								S	R					S					S
Mar	2007	22:45	56.09	קרנית - scrapings שמאל	positive	466	Staphylococcus aureus											S		S		S		S		S	S							S	S	R					S	S				S
May	2007	8:41	35.11	קרנית - scrapings ימין	positive	467	Staphylococcus species											R		S		S		R		S	S							S	S	R					S	S				S
Jan	2007	8:51	14.25	קרנית - scrapings שמאל	positive	467	Staphylococcus species											S		S		S		R		S	S						S	S	S	S					S	S	S			S
Jun	2007	8:53	65.4	קרנית - scrapings ימין	positive	34	Bacillus species											S		R		S		S			S							S		S					S					S
Feb	2007	9:20	89.86	קרנית - scrapings	positive	138	Streptococcus species		S									S		S		S		R										S		S						S	S			S
Oct	2008	10:02		קרנית - scrapings שמאל	positive	467	Staphylococcus species											S	S	S		S		S		S	R								R	R					S					S
Jun	2008	12:23	70.74	קרנית - scrapings שמאל	negative	22	Pseudomonas aeruginosa	S							S				S		S	R					S	R						S			S	S						S
Jun	2008	12:34	19.61	קרנית - scrapings ימין	negative	22	Pseudomonas aeruginosa	S							S				S		S	R					S	S						S			S	S						S
Nov	2008	13:48	82.9	קרנית - scrapings ימין	positive	137	Streptococcus pneumoniae									S		S		S		S		S										S		S							S			S
Apr	2008	14:24	60.08	קרנית - scrapings שמאל	negative	14	Citrobacter koseri	S	R		S		S		S	S	S	S	S		S	S					S	S						S			S	S
May	2008	14:44	60.63	קרנית - scrapings ימין	positive	466	Staphylococcus aureus											S	S	R		S		R		S	S								S	R					S					S
Oct	2008	15:18	29.11	קרנית - scrapings שמאל	positive	466	Staphylococcus aureus											S	S	S		S		S		S	S								S	R					S					S
May	2008	16:06	71.48	קרנית - scrapings שמאל	negative	22	Pseudomonas aeruginosa	S							S				S		S	R					S	R						R			S	S						S
Jul	2008	16:51	45.87	קרנית - scrapings ימין	positive	467	Staphylococcus species											S	S	S		S		S		S	S								R	R					S					S
May	2008	17:15	33.09	קרנית - scrapings ימין	positive	34	Bacillus species											S	S	R		S		S			S									S										S
Jul	2008	17:27	23.92	קרנית - scrapings שמאל	positive	137	Streptococcus pneumoniae									S		S		S		S		S										S		R							S			S
Nov	2008	18:39	95.42	קרנית - scrapings שמאל	positive	467	Staphylococcus species											R	R	R		S		R		S	S								R	R					S					S
Aug	2008	18:51	15.03	קרנית - scrapings שמאל	positive	467	Staphylococcus species											S	S	S		S		S		S	S								S	R					S					S
Jul	2008	19:01	78.01	קרנית - scrapings שמאל	positive	467	Staphylococcus species											S	S	S		S		S		S	S								S	R					S					S
Nov	2008	19:07	60.12	קרנית - scrapings ימין	positive	467	Staphylococcus species											S	S	S		S		S		R	S								S	R					S					S
Jun	2008	19:28	75.19	קרנית - scrapings ימין	positive	467	Staphylococcus species											R	R	S		S		R		S	R								R	R					S					S
Jul	2008	20:37	77.67	קרנית - scrapings ימין	positive	466	Staphylococcus aureus											S	S	S		S		S		S	S								S	R					S					S
Mar	2008	21:07	42.45	קרנית - scrapings שמאל	positive	466	Staphylococcus aureus											S	S	S		S		S		S	S								S	R					S					S
Apr	2008	21:28	45.81	קרנית - scrapings שמאל	negative	246	Haemophilus influenzae		S		S					S	S	S				S
Oct	2008	22:02	49.23	קרנית - scrapings ימין	negative	315	Enterobacter species	S	S		S		I		S	S	S	S	S		S	S	S				S	S						S			S	S						S
Nov	2008	22:31	73.44	קרנית - scrapings ימין	positive	137	Streptococcus pneumoniae									S		S		S		S		S										S		S							S			S
Oct	2008	22:48	37.38	קרנית - scrapings שמאל	positive	137	Streptococcus pneumoniae									S		S		S		S		S										S		R							S			S
Apr	2008	8:27	21.98	קרנית - scrapings ימין	positive	137	Streptococcus pneumoniae									S		S		S		S		R										S		R							R			S
Feb	2008	8:28	15.34	קרנית - scrapings שמאל	positive	137	Streptococcus pneumoniae									S		S		S		S		R										S		R							R			S
May	2008	8:36	36.63	קרנית - scrapings שמאל	positive	467	Staphylococcus species											S	S	S		S		S		S	S								S	R					S					S
Mar	2008	8:54	4.04	קרנית - scrapings	positive	633	Streptococcus species		S							S		S		S		S		S										S		S										S
Nov	2008	8:59	28.97	קרנית - scrapings ימין	positive	466	Staphylococcus aureus											S	S	R		S		R		S	S								S	R					S					S
Jul	2008	9:03	39.25	קרנית - scrapings ימין	positive	466	Staphylococcus aureus											S	S	S		S		S		S	S								S	R					S					S
Dec	2008	9:35	18.83	קרנית - scrapings ימין	positive	467	Staphylococcus species											S	S	S		S		S		R	S								S	R					S					S
Dec	2009	0:18	7.36	קרנית - scrapings שמאל	negative	118	Moraxella catarrhalis		R		S					S	S	S				S
Feb	2009	1:56	62.08	קרנית - scrapings ימין	positive	137	Streptococcus pneumoniae									S		S		S		S		S										S		R							S			S
Jul	2009	11:10	50.03	קרנית - scrapings ימין	positive	467	Staphylococcus species											R	S	S		S		S		S	S								S	R					S					S
Jul	2009	11:17	27.3	קרנית - scrapings שמאל	positive	467	Staphylococcus species
Feb	2009	11:21	77.88	קרנית - scrapings ימין	positive	137	Streptococcus pneumoniae									S		S		S		S		S										S		I							S			S
Nov	2009	12:05	71.51	קרנית - scrapings ימין	positive	137	Streptococcus pneumoniae									S		S		S		S		S										S		S							S			S
Sep	2009	12:16	26.5	קרנית - scrapings שמאל	positive	467	Staphylococcus species											S	S	S		S		S		S	S								S	R					S					S
Dec	2009	13:03	14.3	קרנית - scrapings שמאל	negative	22	Pseudomonas aeruginosa	S							S				S		S	R					S	S						S			S	S						S
Aug	2009	13:24	22.88	קרנית - scrapings ימין	negative	22	Pseudomonas aeruginosa	S							S				S		S	R					S	S						S			S	S						S
Feb	2009	13:35	53.01	קרנית - scrapings ימין	positive	535	Corynebacterium urealyticum											S	S	S		S		S		S	S								S	S					S					S
Nov	2009	13:39	65.85	קרנית - scrapings שמאל	positive	137	Streptococcus pneumoniae		S							S		S		S		S		S										S		S										S
Oct	2009	13:48	43.17	קרנית - scrapings ימין	positive	137	Streptococcus pneumoniae									S		S		S		S		S										S		R							S			S
May	2009	14:14	29.54	קרנית - scrapings ימין	positive	467	Staphylococcus species											S	S	S		R		S		S	S								S	R					S					S
Dec	2009	14:37	27.5	קרנית - scrapings	negative	90	Pseudomonas stutzeri	S							S				S		S						S	S						S			S	S						S
May	2009	16:24	78.11	קרנית - scrapings	positive	467	Staphylococcus species											R	S	S		S		S		R	S								R	R					S					S
Jun	2009	16:41	99.18	קרנית - scrapings שמאל	positive	137	Streptococcus pneumoniae									S		S		S		S		S										S		S							S			S
Oct	2009	16:44	82.97	קרנית - scrapings ימין	positive	138	Streptococcus species		S							S		S		S		S		S										S		S										S
Feb	2009	19:21	30.09	קרנית - scrapings ימין	positive	467	Staphylococcus species											R	S	S		S		S		R	S								R	R					S					S
Apr	2009	20:49	54.2	קרנית - scrapings שמאל	negative	22	Pseudomonas aeruginosa	S							S				S		S	R					S	S						S			S	S						S
Jul	2009	21:36	18.94	קרנית - scrapings ימין	negative	22	Pseudomonas aeruginosa	S							S				R		S	R					R	S						R			R	R						R
Sep	2009	22:13	75.72	קרנית - scrapings שמאל	negative	22	Pseudomonas aeruginosa	S							S				S		S	R					S	S						S			S	S						S
Jan	2009	23:44	20.81	קרנית - scrapings ימין	positive	155	Streptococcus mitis		S							S		S		R		S		R										S		S										S
Mar	2009	9:34	28.06	קרנית - scrapings שמאל	positive	467	Staphylococcus species											R	S	R		S		R		S	S								S	R					S					S
Oct	2010	0:43	26.99	קרנית - scrapings שמאל	positive	467	Staphylococcus species											S	S	S		S		S		S	S								S	R					S					S
Jan	2010	10:08	54.58	קרנית - scrapings שמאל	negative	246	Haemophilus influenzae		S		S					S	S	S				S
Sep	2010	10:12	76.35	קרנית - scrapings	negative	11	Serratia marcescens	S	R		R		R		S	S	R	S	S		R	S	S				S	S						S			S	S						S
Sep	2010	10:37	69.55	קרנית - scrapings ימין	positive	467	Staphylococcus species
Aug	2010	11:13	24.03	קרנית - scrapings ימין	positive	467	Staphylococcus species											R	R	S		R		S		S	S								R	R					S					S
Oct	2010	12:18	18.43	קרנית - scrapings ימין	positive	467	Staphylococcus species											R	S	R		S		R		S	S								S	R					S					S
Jan	2010	12:35	9.45	קרנית - scrapings ימין	positive	466	Staphylococcus aureus											S	S	R		S		R		S	S								S	R					S					S
Aug	2010	12:57	20.3	קרנית - scrapings שמאל	positive	138	Streptococcus species		S							S		S		S		S		S										S		S										S
Oct	2010	13:23	35.11	קרנית - scrapings שמאל	positive	466	Staphylococcus aureus											S	S	S		S		S		S	S								S	R					S					S
Mar	2010	13:37	73.96	קרנית - scrapings ימין	positive	540	Corynebacterium species											S	S	S		S		S		S	S								S	S					S					S
Aug	2010	13:49	44.5	קרנית - scrapings שמאל	positive	467	Staphylococcus species											S	S	S		S		S		S	S								S	R					S					S
Feb	2010	14:27	68.16	קרנית - scrapings שמאל	positive	467	Staphylococcus species											S	S	S		S		S		S	S								S	S					S					S
Feb	2010	14:38	18.84	קרנית - scrapings	positive	138	Streptococcus species		S							S		S		S		S		S										S		S										S
Dec	2010	15:46	34.36	קרנית - scrapings שמאל	positive	466	Staphylococcus aureus											S	S	S		S		S		S	S								S	R					S					S
Jun	2010	16:25	32.58	קרנית - scrapings שמאל	negative	22	Pseudomonas aeruginosa	S							S				S		S	R					S	S						S			S	S						S
Oct	2010	16:36	20.47	קרנית - scrapings ימין	positive	466	Staphylococcus aureus											S	S	R		S		R		S	S								S	R					S					S
Feb	2010	16:45	76.15	קרנית - scrapings שמאל	negative	22	Pseudomonas aeruginosa	S							S				S		S	R					S	S						S			S	S						S
May	2010	17:56	26.15	קרנית - scrapings	positive	467	Staphylococcus species											S	S	S		S		S		S	R								S	R					S					S
Oct	2010	18:46	40.92	קרנית - scrapings ימין	negative	22	Pseudomonas aeruginosa	S							S				S		S	R					S	S						S			S	S						S
May	2010	18:58	36.58	קרנית - scrapings שמאל	negative	115	Moraxella lacunata	S	S		S		S		S	S	S	S	S		S	S	S				S	S						S			S	S						S
Aug	2010	2:45	18.98	קרנית - scrapings ימין	negative	22	Pseudomonas aeruginosa	S							S				S		S	R					S	S						S			S	S						S
Mar	2010	21:12	74.99	קרנית - scrapings שמאל	negative	246	Haemophilus influenzae		S		S					S	S	S				S
Dec	2010	8:30	35.33	קרנית - scrapings ימין	positive	466	Staphylococcus aureus											S	S	I		S		R		S	S								S	R					S					S
Mar	2010	9:06	28.61	קרנית - scrapings ימין	negative	22	Pseudomonas aeruginosa	S							S				S		S	R					S	S						S			R	S						S
Oct	2010	9:30	72.72	קרנית - scrapings שמאל	positive	466	Staphylococcus aureus											S	S	S		S		S		S	S								S	S					S					S
Oct	2011	11:07	37	קרנית - scrapings ימין	positive	467	Staphylococcus species												S	S		S		S			S								S	R					S					S
Jul	2011	13:36	65.17	קרנית - scrapings ימין	positive	137	Streptococcus pneumoniae									S				S		R		S												R							S			S
Sep	2011	13:47	16.6	קרנית - scrapings	negative	22	Pseudomonas aeruginosa	S							S				S		S	R					S	S									S	S						S
Nov	2011	13:54	72.08	קרנית - scrapings שמאל	positive	466	Staphylococcus aureus												S	S		S		S			S								S	R					S					S
Mar	2011	14:04	30.1	קרנית - scrapings	negative	22	Pseudomonas aeruginosa	S							S				S		S	R					S	S									S	S						S
Mar	2011	14:13	41.04	קרנית - scrapings	negative	11	Serratia marcescens	S	R		R		R		S	S	S	S	S		R	S	S				S	S									S	S						S
Jun	2011	14:24	79.44	קרנית - scrapings שמאל	positive	467	Staphylococcus species												S	S		S		S			S								S	R					S					S
Dec	2011	14:53	16.04	קרנית - scrapings שמאל	positive	467	Staphylococcus species												S	S		S		S			S								S	R					S					S
Dec	2011	16:54	31.99	קרנית - scrapings שמאל	positive	467	Staphylococcus species												S	S		S		S			S								S	R					S					S
Jul	2011	17:11	81.3	קרנית - scrapings שמאל	positive	137	Streptococcus pneumoniae									S				S		S		S												S							S			S
Aug	2011	17:23	22.79	קרנית - scrapings ימין	negative	22	Pseudomonas aeruginosa	S							S				S		S	R					S	S									S	S						S
Feb	2011	17:36	37.62	קרנית - scrapings שמאל	positive	467	Staphylococcus species												R	S		S		R			R								S	R					S					S
Aug	2011	17:49	19.42	קרנית - scrapings ימין	negative	22	Pseudomonas aeruginosa	S							S				S		S	R					S	S									S	S						S
Feb	2011	18:49	50.54	קרנית - scrapings שמאל	positive	467	Staphylococcus species
Feb	2011	18:59	34.91	קרנית - scrapings שמאל	negative	22	Pseudomonas aeruginosa	S							S				S		S	R					S	S									S	S						S
Feb	2011	20:01	65.26	קרנית - scrapings שמאל	negative	32	Moraxella species	S	R		S		S		S	S	S	S	S		S	S	S				S	S									R	S						S
Apr	2011	20:05	23.15	קרנית - scrapings ימין	positive	467	Staphylococcus species												S	S		S		S			S								S	R					S					S
May	2011	20:05	23.53	קרנית - scrapings ימין	positive	137	Streptococcus pneumoniae		S							S				S		S		S												S										S
Dec	2011	20:20	17.91	קרנית - scrapings שמאל	negative	22	Pseudomonas aeruginosa	S							S				S		S	R					S	S									S	S						S
Oct	2011	22:02	91.5	קרנית - scrapings ימין	negative	22	Pseudomonas aeruginosa	S							S				S		S	R					S	S									S	S						S
Dec	2011	22:35	47.11	קרנית - scrapings שמאל	positive	137	Streptococcus pneumoniae									S				R		S		R												R							S			S
Sep	2011	22:39	21.06	קרנית - scrapings ימין	positive	467	Staphylococcus species												S	S		S		S			S								S	R					S					S
Jan	2011	9:08	68.53	קרנית - scrapings ימין	positive	467	Staphylococcus species												S	S		S		R			S								S	S					S					S
Sep	2011	9:28		קרנית - scrapings	negative	6	Escherichia coli	S	R	S	S		S		S	S	S	S	S		S	R	S				S	S									R	S						S
May	2011	9:49	23.84	קרנית - scrapings ימין	negative	22	Pseudomonas aeruginosa	S							S				S		S	R					S	S									S	S						S
Apr	2011	9:53	37.72	קרנית - scrapings ימין	positive	467	Staphylococcus species												S	S		S		R			S								R	R					S					S
May	2012	0:35	4.78	קרנית - scrapings ימין	positive	137	Streptococcus pneumoniae									S				S		S		S												R							S			S
Feb	2012	1:13	45.15	קרנית - scrapings שמאל	positive	137	Streptococcus pneumoniae									S				S		I		S												R							S			S
Jan	2012	10:46	21.17	קרנית - scrapings ימין	positive	467	Staphylococcus species												S	R		S		R			S								S	R					S					S
Apr	2012	13:36	69.31	קרנית - scrapings	negative	115	Moraxella lacunata	S							S				S		S	S					S	S									S	S						S
May	2012	14:08	76.11	קרנית - scrapings שמאל	positive	126	Staphylococcus epidermidis												S	S		R		S			R								S	R					S					S
Aug	2012	14:09	45.45	קרנית - scrapings שמאל	positive	466	Staphylococcus aureus												S	S		S		S			S								S	R					S					S
Mar	2012	14:50	47.02	קרנית - scrapings	positive	137	Streptococcus pneumoniae									S				S		S		S												S							S			S
Apr	2012	14:54	68.28	קרנית - scrapings שמאל	positive	466	Staphylococcus aureus												S	S		S		S			R								S	R					S					S
Mar	2012	15:00	70.26	קרנית - scrapings שמאל	positive	467	Staphylococcus species												S	S		S		R			S								S	S					S					S
Mar	2012	15:03	8.31	קרנית - scrapings	negative	6	Escherichia coli	S	S		S		S		S	S	S	S	S		S	S	S				S	S									S	S						S
Sep	2012	16:02	64.59	קרנית - scrapings	negative	22	Pseudomonas aeruginosa	S							S				S		S	R					S	S									S	S						S
Nov	2012	16:09	83.1	קרנית - scrapings	positive	699	Staphylococcus lugdunensis												S	S		S		S			S								S	R					S					S
Jun	2012	16:39	77.76	קרנית - scrapings ימין	negative	22	Pseudomonas aeruginosa	S							S				S		S	R					S	S									S	S						S
Jul	2012	16:46	47.36	קרנית - scrapings ימין	positive	466	Staphylococcus aureus												S	S		S		S			S								S	R					S					S
Nov	2012	18:39	22.1	קרנית - scrapings שמאל	positive	184	Propionibacterium acnes
Dec	2012	18:47	85.73	קרנית - scrapings ימין	negative	246	Haemophilus influenzae		R		R					S	R	S				S
Sep	2012	18:50	18.28	קרנית - scrapings	positive	184	Propionibacterium acnes												S	S		R		S			S									R					S					S
Mar	2012	18:52	41.35	קרנית - scrapings שמאל	positive	126	Staphylococcus epidermidis												S	S		S		R			S								R	R					S					S
Oct	2012	18:52	70.42	קרנית - scrapings שמאל	positive	375	Abiotrophia defectiva									S				S		S		R												R										S
Oct	2012	18:54	36.31	קרנית - scrapings ימין	positive	126	Staphylococcus epidermidis												S	R		S		R			S								S	R					S					S
Nov	2012	19:25	65.82	קרנית - scrapings	positive	540	Corynebacterium species												S	R		S		S			S								S	S					S					S
Apr	2012	22:16	70.99	קרנית - scrapings שמאל	positive	466	Staphylococcus aureus												S	S		S		S			S								S	R					S					S
May	2012	22:19	40.79	קרנית - scrapings שמאל	positive	466	Staphylococcus aureus												S	S		S		S			S								S	R					S					S
Oct	2012	23:22	19.24	קרנית - scrapings ימין	positive	137	Streptococcus pneumoniae									S				S		R		S												R							S			S
Sep	2012	23:25	32.41	קרנית - scrapings שמאל	negative	22	Pseudomonas aeruginosa	S							S				S		S	R					S	R									S	S						S
Apr	2012	23:31	27.38	קרנית - scrapings שמאל	positive	137	Streptococcus pneumoniae									S				S		S		S												R							S			S
Apr	2012	8:48	59.08	קרנית - scrapings שמאל	positive	137	Streptococcus pneumoniae									S				S		S		S												R							S			S
Oct	2012	9:15	24.6	קרנית - scrapings ימין	negative	22	Pseudomonas aeruginosa	S							S				S		S	R					S	S									S	S						S
Apr	2012	9:18	73.28	קרנית - scrapings שמאל	negative	246	Haemophilus influenzae		R		R					S	R	S				S
Apr	2012	9:21	7.09	קרנית - scrapings ימין	positive	2222	Undefined gram positive cocci												S	R		R		R			R									S					S					S
Oct	2012	9:37	76.14	קרנית - scrapings שמאל	negative	22	Pseudomonas aeruginosa	S							S				S		S	R					S	S									S	S						S
Mar	2012	9:40	75.47	קרנית - scrapings שמאל	positive	467	Staphylococcus species												R	S		R		R			S								R	R					S					S
Dec	2013	10:36	0.02	קרנית - scrapings שמאל	positive	780	Streptococcus mitis/oralis		R							R				R		R		R												R										S
Jun	2013	10:48	0.04	קרנית - scrapings ימין	positive	126	Staphylococcus epidermidis												R	R		R		R			R								R	R					S					S
May	2013	11:48	38.11	קרנית - scrapings ימין	positive	126	Staphylococcus epidermidis												S	S		S		S			S								S	R					S					S
Oct	2013	11:54	65.24	קרנית - scrapings	negative	115	Moraxella lacunata	S	R		S				S				S		S	S					S	S									S	S						S
Mar	2013	12:07	99.78	קרנית - scrapings שמאל	positive	137	Streptococcus pneumoniae		S							S				S		S		S												S										S
Dec	2013	12:13	19.08	קרנית - scrapings שמאל	positive	126	Staphylococcus epidermidis												S	S		S		S			S								S	R					S					S
Dec	2013	12:17	31.41	קרנית - scrapings	negative	107	Moraxella nonliquefaciens
Sep	2013	13:42	62.04	קרנית - scrapings ימין	negative	14	Citrobacter koseri	S	R		S		S		S	S	S	S	S		S	S	S				S	S									S	S						S
Dec	2013	13:45	57.94	קרנית - scrapings	positive	137	Streptococcus pneumoniae									S		S		S		R		R												R							S			S
Dec	2013	14:08	66	קרנית - scrapings	positive	137	Streptococcus pneumoniae		S							S				S		S		S												S										S
Aug	2013	14:33	46.06	קרנית - scrapings שמאל	positive	540	Corynebacterium species												S	S		S		R			S									S					S					S
Mar	2013	14:40	53.16	קרנית - scrapings ימין	positive	126	Staphylococcus epidermidis												S	S		S		S			S								S	R					S					S
Apr	2013	15:22	62.22	קרנית - scrapings	negative	107	Moraxella nonliquefaciens	S							S				S		S	R					S	S									S	S						S
Sep	2013	15:39	74.7	קרנית - scrapings שמאל	positive	821	Streptococcus gordonii												S	S		S		S			S								S	S					S					S
Dec	2013	16:51	19.14	קרנית - scrapings ימין	positive	137	Streptococcus pneumoniae									S				S		S		R												R							S			S
Jan	2013	17:06	29.91	קרנית - scrapings שמאל	negative	775	Serratia liquifaciens	S	R		R		R		S	S	R	S	S			S	S				S	S									S	S						S
Dec	2013	17:26	78.95	קרנית - scrapings שמאל	positive	126	Staphylococcus epidermidis												S	S		S		R			R								R	R					S					S
Mar	2013	17:41	31.89	קרנית - scrapings ימין	positive	467	Staphylococcus species												S	S		S		S			S								S	R					S					S
Mar	2013	17:56	22.28	קרנית - scrapings	positive	137	Streptococcus pneumoniae		S							S				S		S		S												S										S
Jun	2013	18:09	68.27	קרנית - scrapings שמאל	positive	540	Corynebacterium species												S	S		S		S			S									S										S
Jan	2013	18:24	21.68	קרנית - scrapings שמאל	positive	467	Staphylococcus species
Oct	2013	18:46	96.45	קרנית - scrapings שמאל	negative	107	Moraxella nonliquefaciens
Nov	2013	18:57	65	קרנית - scrapings	positive	540	Corynebacterium species												S	S		S		S			S								S	S					S					S
Dec	2013	19:14	71.92	קרנית - scrapings שמאל	positive	133	Staphylococcus haemolyticus												S	S		S		R			S								R	R					S					S
Sep	2013	20:34	28.57	קרנית - scrapings שמאל	negative	22	Pseudomonas aeruginosa	S							S				S		S	R					S	S									S	S						S
Dec	2013	20:52	89.71	קרנית - scrapings ימין	positive	126	Staphylococcus epidermidis												S	R		S		R			S								R	R					S					S
Dec	2013	21:27	19.18	קרנית - scrapings ימין	negative	22	Pseudomonas aeruginosa	S							S				S		S	R					S	S									S	S						S
Jun	2013	8:31	79.45	קרנית - scrapings שמאל	negative	11	Serratia marcescens	S	R		R		R		S	S	R	S	S		R	S	S				S	S									S	S						S
Sep	2013	8:36	89.78	קרנית - scrapings שמאל	positive	137	Streptococcus pneumoniae									S				S		S		S												S							S			S
Oct	2013	9:03	22.57	קרנית - scrapings שמאל	positive	127	Staphylococcus capitis												S	R		S		R			S								S	S					S					S
Apr	2013	9:17	50.23	קרנית - scrapings	positive	137	Streptococcus pneumoniae		S							S				S		S		S												S										S
Dec	2013	9:36	65.85	קרנית - scrapings שמאל	negative	84	Pseudomonas putida	S							S				S		S	R					S	S									S	S						R
Mar	2013	9:47	0.18	קרנית - scrapings	negative	6	Escherichia coli	S	R		I		R		S	S	S	S	S		S	S	S				S	S									R	S						R
Jul	2014	0:31	30.4	קרנית - scrapings שמאל	positive	466	Staphylococcus aureus												S	R		S		R			S								S	R					S					S
Aug	2014	10:29	20.53	קרנית - scrapings שמאל	negative	22	Pseudomonas aeruginosa	S							S				S		S	R					S	S									S	S						S
Feb	2014	10:46	80.57	קרנית - scrapings ימין	positive	156	Streptococcus sanguinis		S							S				R		R		R												S										S
Nov	2014	13:07	76.87	קרנית - scrapings ימין	negative	82	Stenotrophomonas maltophilia															S										S
Sep	2014	13:38	29.26	קרנית - scrapings ימין	positive	126	Staphylococcus epidermidis												S	S		S		S			S								S	S					S					S
Jul	2014	13:59	31.45	קרנית - scrapings ימין	positive	466	Staphylococcus aureus												S	S		S		S			S								S	R					S					S
Dec	2014	15:22	50.52	קרנית - scrapings ימין	negative	775	Serratia liquifaciens	S	R		S		R		S	S	R	S	S		R	S	S				S	S									S	S						S
Jan	2014	15:29	65.44	קרנית - scrapings שמאל	negative	11	Serratia marcescens	S	R		R		R		S	S	R	S	S		R	S	S				S	S									S	S						S
Nov	2014	15:48	22.43	קרנית - scrapings שמאל	negative	22	Pseudomonas aeruginosa	S							S				S		S	R					S	S									S	S						S
Jul	2014	16:26	73.55	קרנית - scrapings שמאל	positive	804	Corynebacterium tuberculostearicum												R	R		S		R			S									R					S					S
Jan	2014	16:40	20.97	קרנית - scrapings שמאל	negative	22	Pseudomonas aeruginosa	S							S				S		S	R					S	S									S	S						S
Oct	2014	16:51	17.28	קרנית - scrapings ימין	negative	22	Pseudomonas aeruginosa	S							S				S		S	R					S	S									S	S						S
Mar	2014	17:07	70.29	קרנית - scrapings	negative	107	Moraxella nonliquefaciens	S	S		S				S				S		S	S					S	S									S	S						S
Feb	2014	17:55	75.14	קרנית - scrapings שמאל	positive	126	Staphylococcus epidermidis												S	S		S		S			S								S	R					S					S
May	2014	18:39	32.74	קרנית - scrapings שמאל	negative	23	Acinetobacter baumannii	R		R					R	R			R		S	R					R	R				R					R	R						R
Aug	2014	18:49	71.94	קרנית - scrapings שמאל	negative	107	Moraxella nonliquefaciens
Mar	2014	19:24	72.08	קרנית - scrapings ימין	positive	137	Streptococcus pneumoniae									S				S		S		S												S							S			S
Sep	2014	19:57	82.74	קרנית - scrapings שמאל	positive	540	Corynebacterium species												R	R		R		R			R									S					S					S
Nov	2014	20:25	79.93	קרנית - scrapings ימין	negative	246	Haemophilus influenzae		R		S					S	S	S				R
Jun	2014	20:30	0.06	קרנית - scrapings שמאל	positive	126	Staphylococcus epidermidis												R	S		R		R			R								R	R					S					S
Oct	2014	20:58	74.13	קרנית - scrapings	positive	540	Corynebacterium species												S	S		S		S			S								S	S					S					S
May	2014	21:06	85.77	קרנית - scrapings שמאל	negative	107	Moraxella nonliquefaciens	S							S				S		S	S					S	S									S	S						S
Mar	2014	21:09	69.2	קרנית - scrapings ימין	positive	137	Streptococcus pneumoniae		S							S				S		S		S												S										S
Jan	2014	21:13	70.96	קרנית - scrapings שמאל	negative	107	Moraxella nonliquefaciens	S							S				S		S	S					S	S									S	S						S
Aug	2014	21:26	33.93	קרנית - scrapings ימין	positive	126	Staphylococcus epidermidis												S	S		S		S			S								S	S					S					S
May	2014	21:46	32	קרנית - scrapings ימין	positive	795	Staphylococcus warneri												S	S		S		S			S								S	R					S					S
Oct	2014	21:56	33.92	קרנית - scrapings שמאל	positive	126	Staphylococcus epidermidis												S	S		S		S			S								S	S					S					S
Sep	2014	22:27	36.54	קרנית - scrapings ימין	positive	466	Staphylococcus aureus												S	S		S		S			S								S	R					S					S
Sep	2014	23:08	66.77	קרנית - scrapings שמאל	positive	137	Streptococcus pneumoniae									S		S		S		S		S												S							S			S
Mar	2014	23:28	75.21	קרנית - scrapings שמאל	positive	137	Streptococcus pneumoniae									S		S		R		S		R												R							S			S
Mar	2014	7:56	0.16	קרנית - scrapings שמאל	negative	118	Moraxella catarrhalis		R		S					S	S	S				S
Jul	2014	8:59	19.54	קרנית - scrapings	positive	126	Staphylococcus epidermidis												S	S		S		S			S								S	R					S					S
Oct	2014	9:01	45.19	קרנית - scrapings ימין	positive	137	Streptococcus pneumoniae									S		S		S		S		R												R							R			S
Oct	2014	9:01	60.84	קרנית - scrapings שמאל	negative	115	Moraxella lacunata	S	S		S				S				S		S	S					S	S
Aug	2014	9:09	22.54	קרנית - scrapings ימין	negative	790	Actinomyces viscosus		S										S	S		S		S			S								S	S					S					S
May	2014	9:11	0.02	קרנית - scrapings שמאל	negative	6	Escherichia coli	S	R		S		I		S	S	S	S	S		S	S	S				S	S									R	S						S
Sep	2014	9:14	12.32	קרנית - scrapings ימין	negative	22	Pseudomonas aeruginosa	S							S				S		S	R					S	S									S	S						S
Jun	2014	9:59	66.48	קרנית - scrapings שמאל	negative	107	Moraxella nonliquefaciens	S							S				S		S	S					S	S									S	S						S
